# Supplementary material for: A new process-based and scale-aware desert dust emission scheme for global climate models – Part II: Evaluation in the Community Earth System Model version 2 (CESM2)
Source: Copernicus journal article supplement (doi:10.5194/acp-24-2287-2024), 2024-02-22
Supplement: Supplementary file 1 [file acp-24-2287-2024-supplement.pdf]

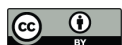

*Supplement of*

**A new process-based and scale-aware desert dust emission scheme for global climate models – Part II: Evaluation in the Community Earth System Model version 2 (CESM2)**

**Danny M. Leung et al.**

*Correspondence to:* Danny M. Leung ([dannymleung@ucla.edu](mailto:dannymleung@ucla.edu))

The copyright of individual parts of the supplement might differ from the article licence.

Section S1. Significance in correlation differences.

25 For Fig. 10f, we use Fisher's  $Z$  transformation (Fisher, 1992) to test how significant a Pearson correlation coefficient is different from another. To compute a 2-tailed  $p$ -value of difference in correlations, the computation is a function of the two correlations (e.g., MIDAS DAOD vs. our scheme's DAOD as  $R_1$ ; MIDAS DAOD vs. Z03's DAOD as  $R_2$ ) and the sample size (for each grid, 2004–2008 daily data are in total  $n_1 = n_2 = 1827$ ):

$$Z_1 = 0.5 \ln \left( \frac{1+R_1}{1-R_1} \right) \quad (S1)$$

$$30 \quad Z_2 = 0.5 \ln \left( \frac{1+R_2}{1-R_2} \right) \quad (S2)$$

$$\text{score} = \frac{Z_1 - Z_2}{\sqrt{\frac{1}{n_1-3} + \frac{1}{n_2-3}}} \quad (S3)$$

Then we use the look up table to yield the  $p$ -value for the score. For computers,

$$p \text{ value} = 2 \times \text{pnorm}(\text{abs}(\text{score})) \quad (S4)$$

Then, for instance,

35 If  $R_1 = 0.45, R_2 = 0.4$ , then  $p$ -value  $\sim 0.065 > 0.05$ ;

If  $R_1 = 0.65, R_2 = 0.6$ , then  $p$ -value  $\sim 0.013 < 0.05$ ;

If  $R_1 = 0.85, R_2 = 0.8$ , then  $p$ -value  $\sim 10^{-6} \ll 0.05$ .

40 Comparing with other maps of correlation differences in Figs. 6d-f with  $|\Delta R|$  of 0.1–0.3, Fig. 10f overall has grids with much smaller  $|\Delta R|$  values of  $< 0.02$ , which are not statistically significant.  $|\Delta R|$  for any gridcell has to be  $> 0.082$  to yield a  $p$ -value of  $< 0.05$ .

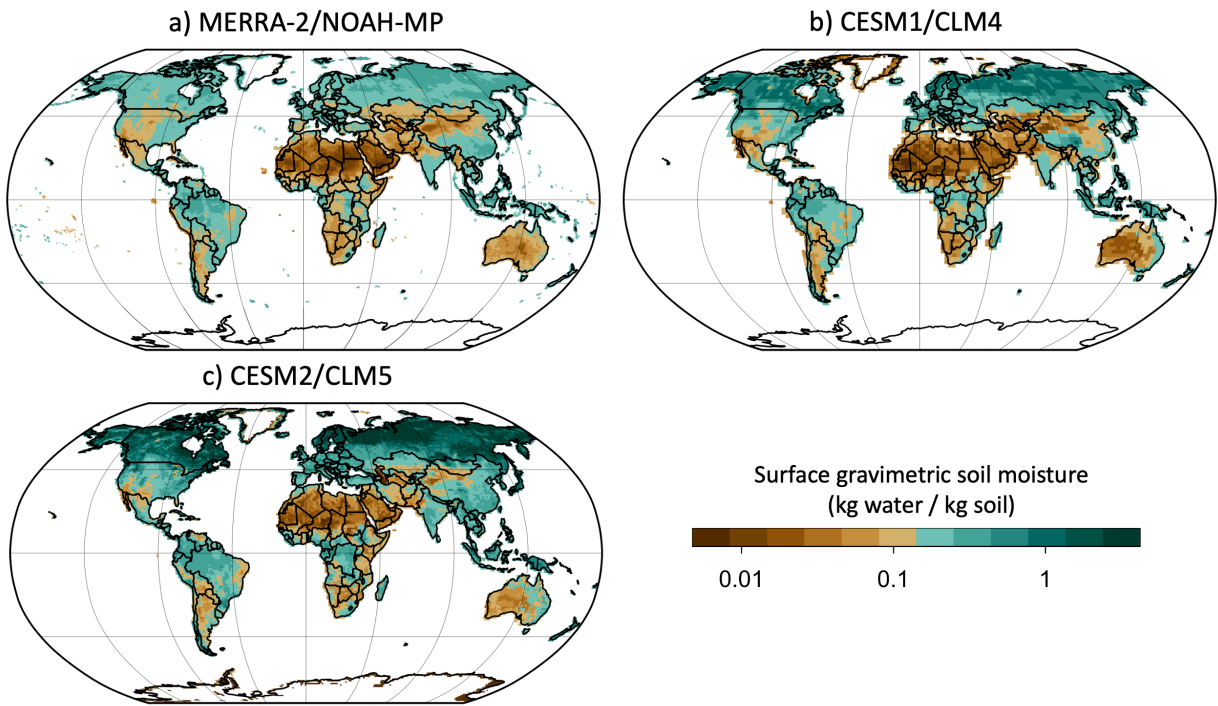

45 Figure S1. Gravimetric soil moisture for the topmost soil layer for (a) MERRA-2, (b) CLM4, and (c) CLM5.

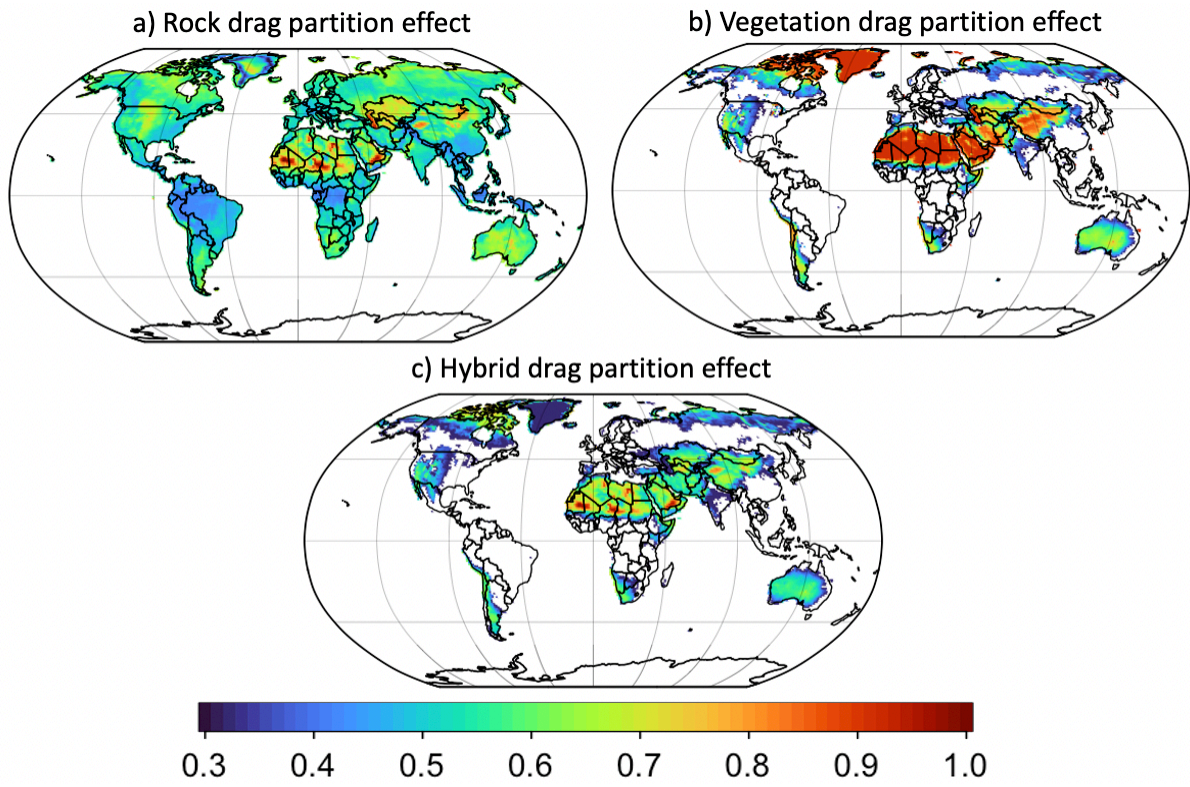

50 Figure S2. Drag partition effects due to (a) rocks, (b) green + brown vegetation, and (c) their combined effect.

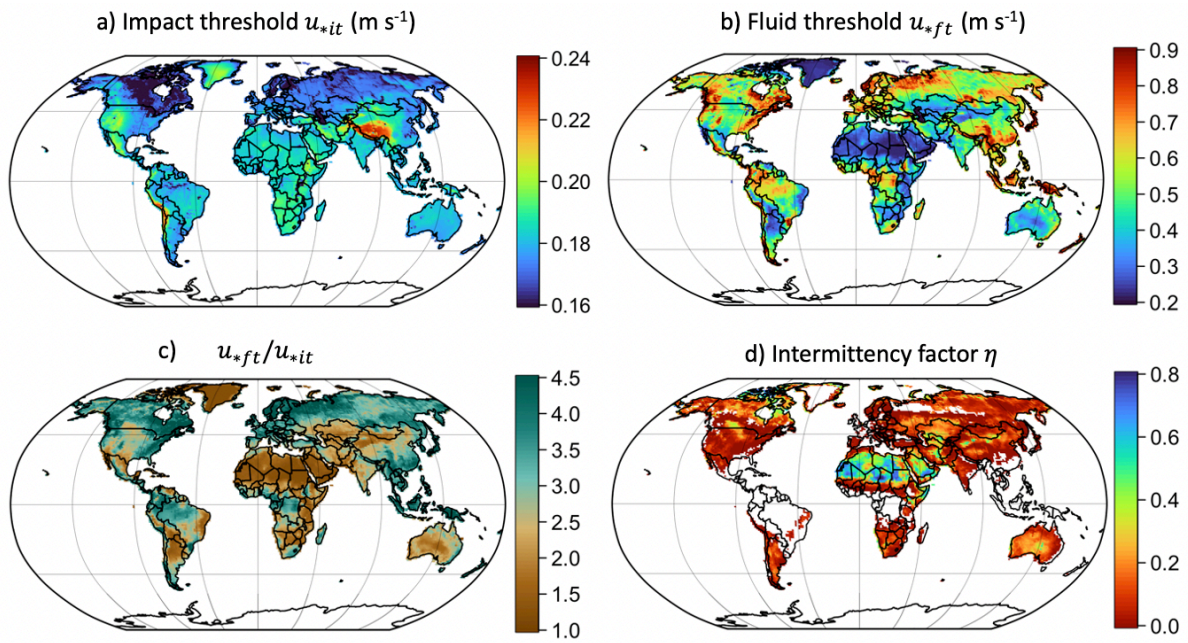

55 Figure S3. Dust emission thresholds and intermittency factor simulated by CLM5. (a) impact threshold friction velocity  $u_{*it}$ , (b) fluid threshold friction velocity  $u_{*ft}$ , (c) ratio of fluid to impact threshold  $u_{*ft}/u_{*it}$ , and (d) intermittency factor  $\eta$  for 2004–2008.

60

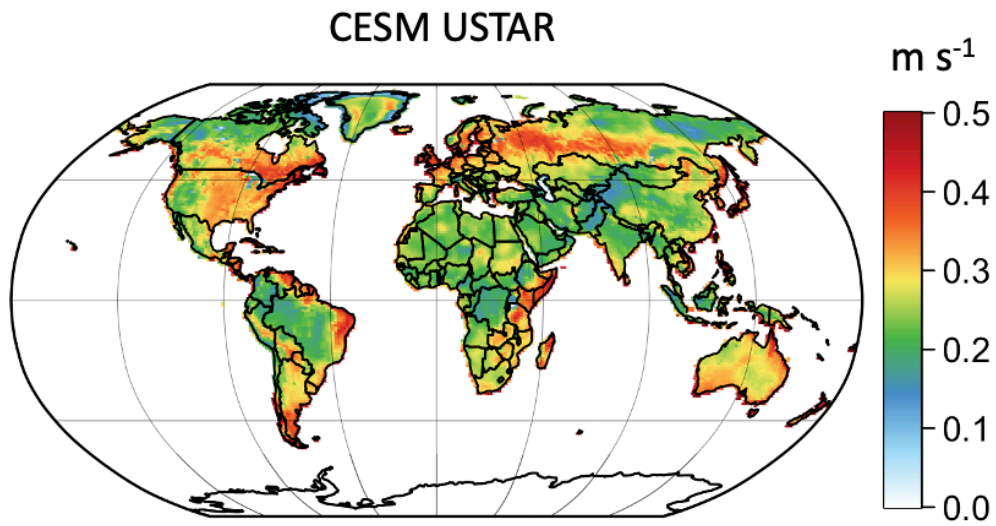

65 Figure S4. The CESM2 2004–2008 mean friction velocity  $u_*$  ( $\text{m s}^{-1}$ ) for calculating dust emissions in CLM5. The wind comes from CAM6 with its meteorology nudged toward the MERRA-2 meteorology.

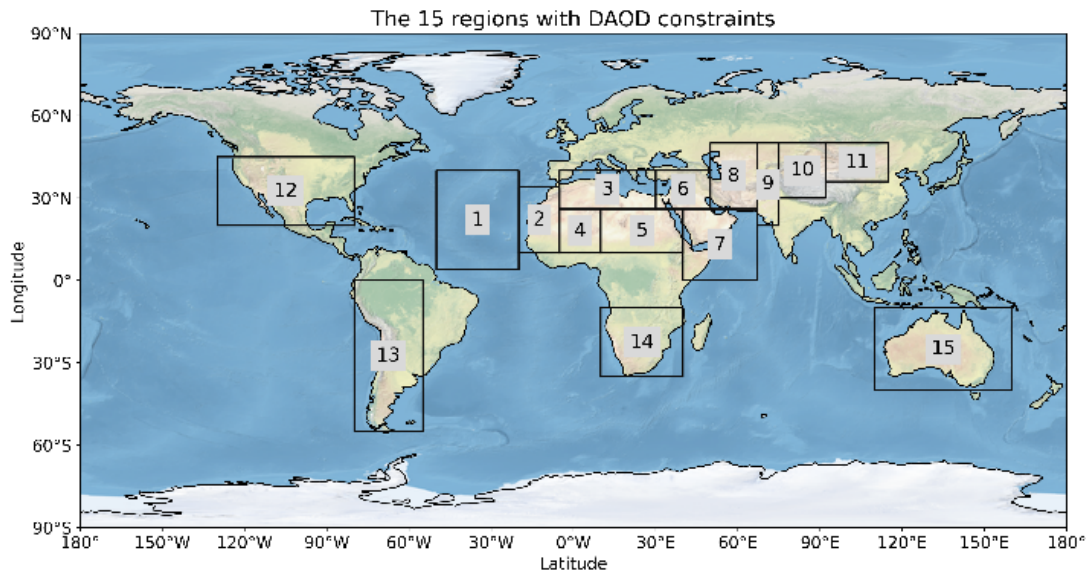

70 Figure S5. Coordinates of the 15 observed dusty regions with the Ridley et al. (2016) constraints on  
the regional DAOD. The coordinates of the 15 dusty regions are: (1) Mid-Atlantic (50–20°W; 4–40°N),  
(2) African west coast (20–5°W; 10–34°N), (3) Northern Africa (5°W–30°E; 26–40°N), (4) Mali /  
Niger (5°W–10°E; 10–26°N), (5) Bodélé / Sudan (10–40°E; 10–26°N), (6) Northern Middle East (30–  
50°E; 26–40°N), (7) Southern Middle East (40–67.5°E; 0–26°N), (8) Kyzylkum (50–67.5°E; 26–  
50°N), (9) Thar (67.5–75°E; 20–50°N), (10) Taklamakan (75–92.5°E; 30–50°N), (11) Gobi (92.5–  
75 115°E; 36–50°N), (12) North America (130–80°W; 20–45°N), (13) South America (80–55°W; 55–  
0°S), (14) Southern Africa (10–40°E; 35–10°S), and (15) Australia (110–160°E; 40–10°S). The figure  
is adapted from Kok et al. (2021).

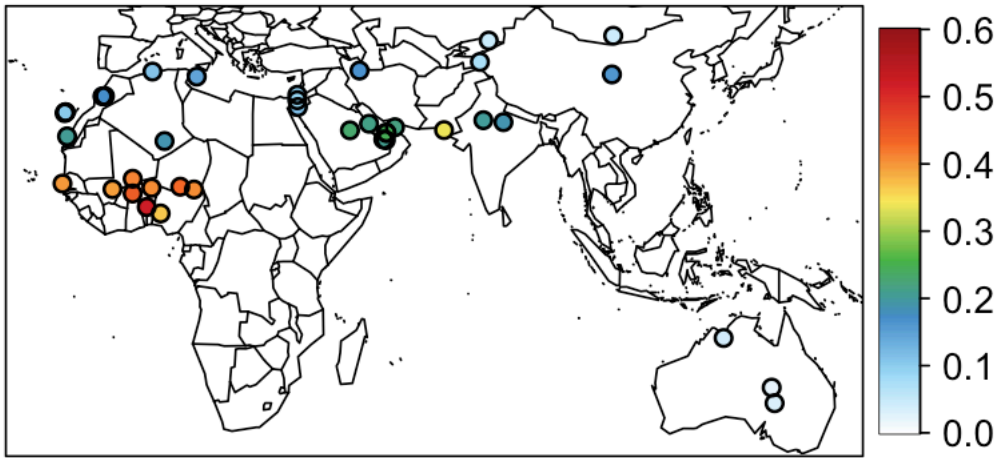

80 Figure S6. AERONET-SDA AOD, averaged across all available observations within years 2004–2008, for 39 selected dust-dominant AERONET stations following Kok et al. (2014b).



Our scheme's DAOD minus K14 DAOD

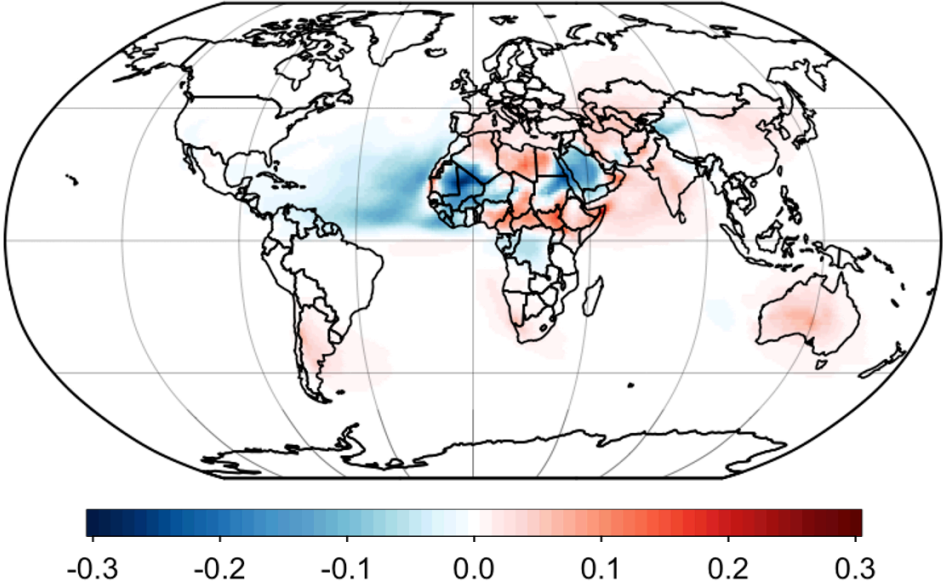

85 Figure S7. Global DAOD difference between our new scheme (Leung et al., 2022) and the K14 scheme, i.e., Fig. 3b minus Fig. 3a.

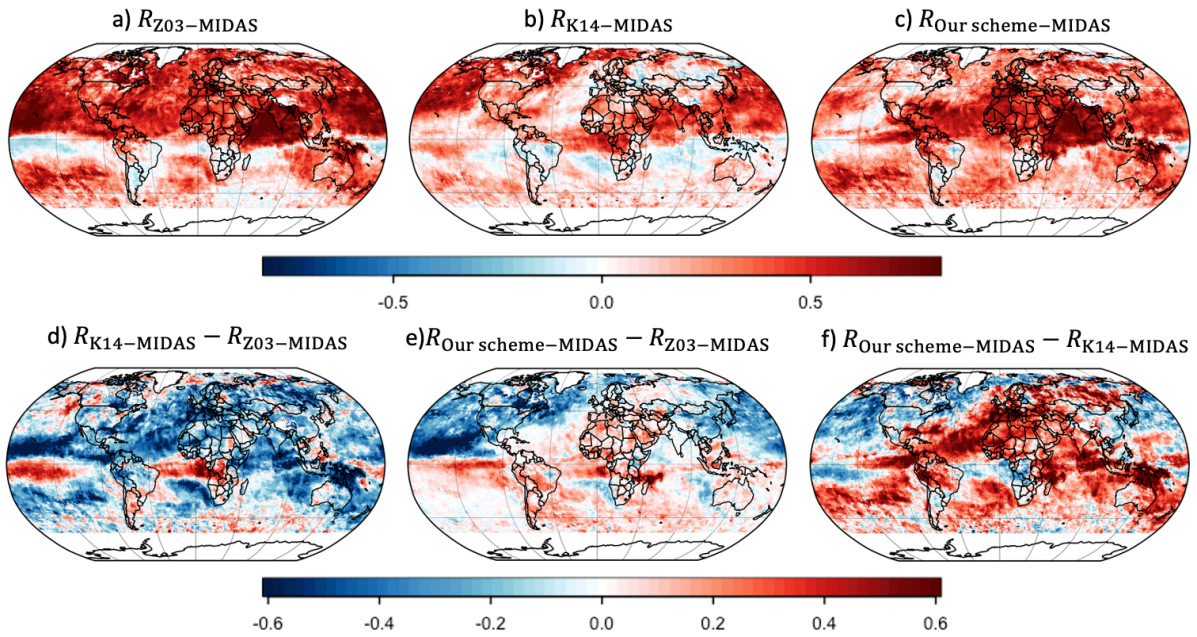

90 Figure S8. Grid-by-grid MIDAS DAOD daily correlation maps with CESM2 for 2004–2008. (a–c)  
 95 Correlation maps  $R$  of MIDAS daily DAOD time series vs. CESM2 daily DAOD time series using (a)  
 Z03, (b) K14, and (c) our scheme. The correlation maps focus on gridboxes with MIDAS DAOD/AOD  
 ratio  $> 0.25$  only. (d–f) Changes ( $\Delta R$ ) in correlation maps between CESM and MIDAS DAOD, from  
 (d) Z03 to K14, (e) Z03 to our scheme, and from (f) K14 to our scheme. This figure is the same as Fig.  
 6 in the main text but no masking for low MIDAS DAOD / AOD values.

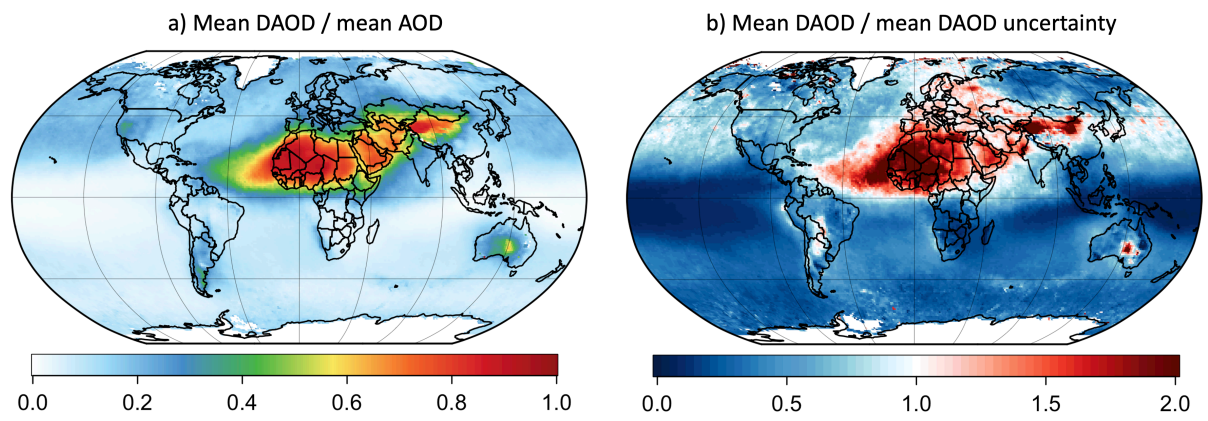

105 Figure S9. MIDAS (a) mean DAOD / mean total AOD values, and (b) ratio of mean DAOD / mean DAOD uncertainty (quantified by Gkikas et al., 2021), averaged across 2004–2008. Polar regions and snow/ice covered continents have no values.

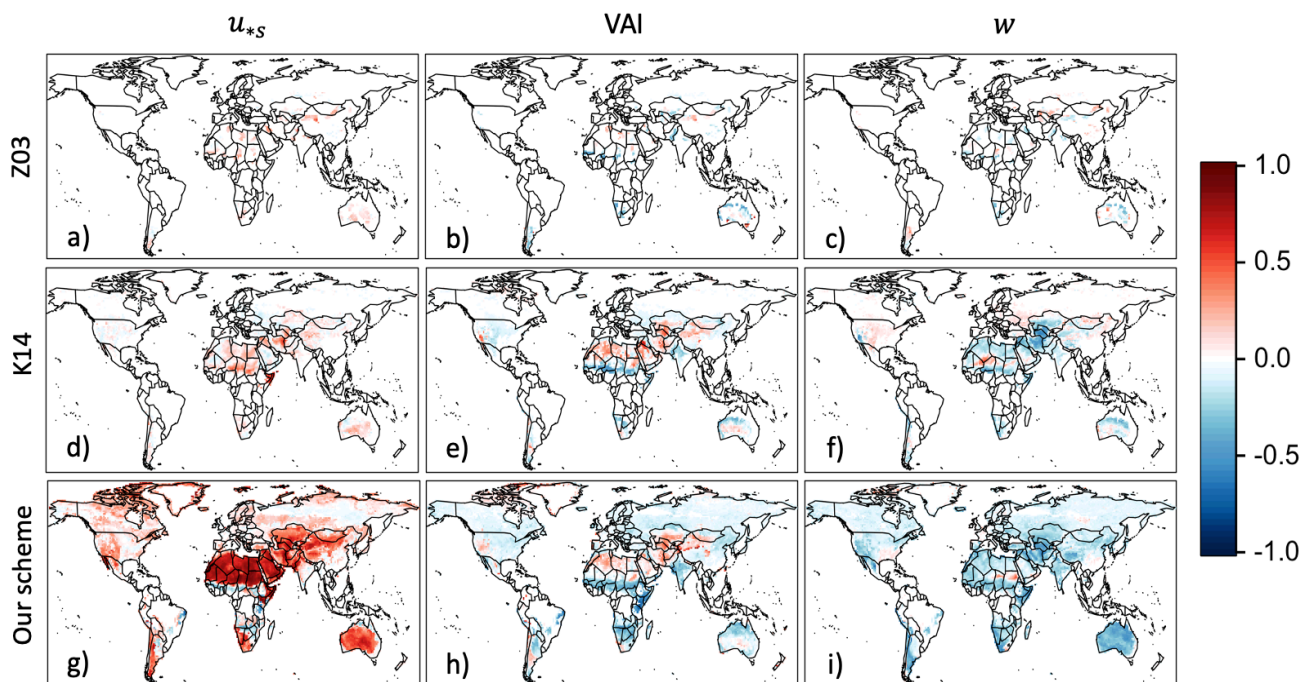

110 Figure S10. Grid-by-grid daily Pearson correlation maps between simulated dust emissions and the  
 three fundamental driving meteorological fields in CESM2 for 2004–2008. Each row represents an  
 emission scheme, including (a-c) Z03, (d-f) K14, and (g-i) our scheme. Each column represents a  
 meteorological or land surface field in CESM2 that fundamentally drives dust emission, including soil  
 surface friction velocity  $u_{*s}$  ( $\text{m s}^{-1}$ ) as the left column (we use  $u_*$  for Z03 and K14), vegetation area  
 index (VAI;  $\text{m}^2 \text{ plant} / \text{m}^2 \text{ land}$ ) as the middle column, and soil moisture  $w$  ( $\text{kg water} / \text{kg soil}$ ) as the  
 115 right column.

120

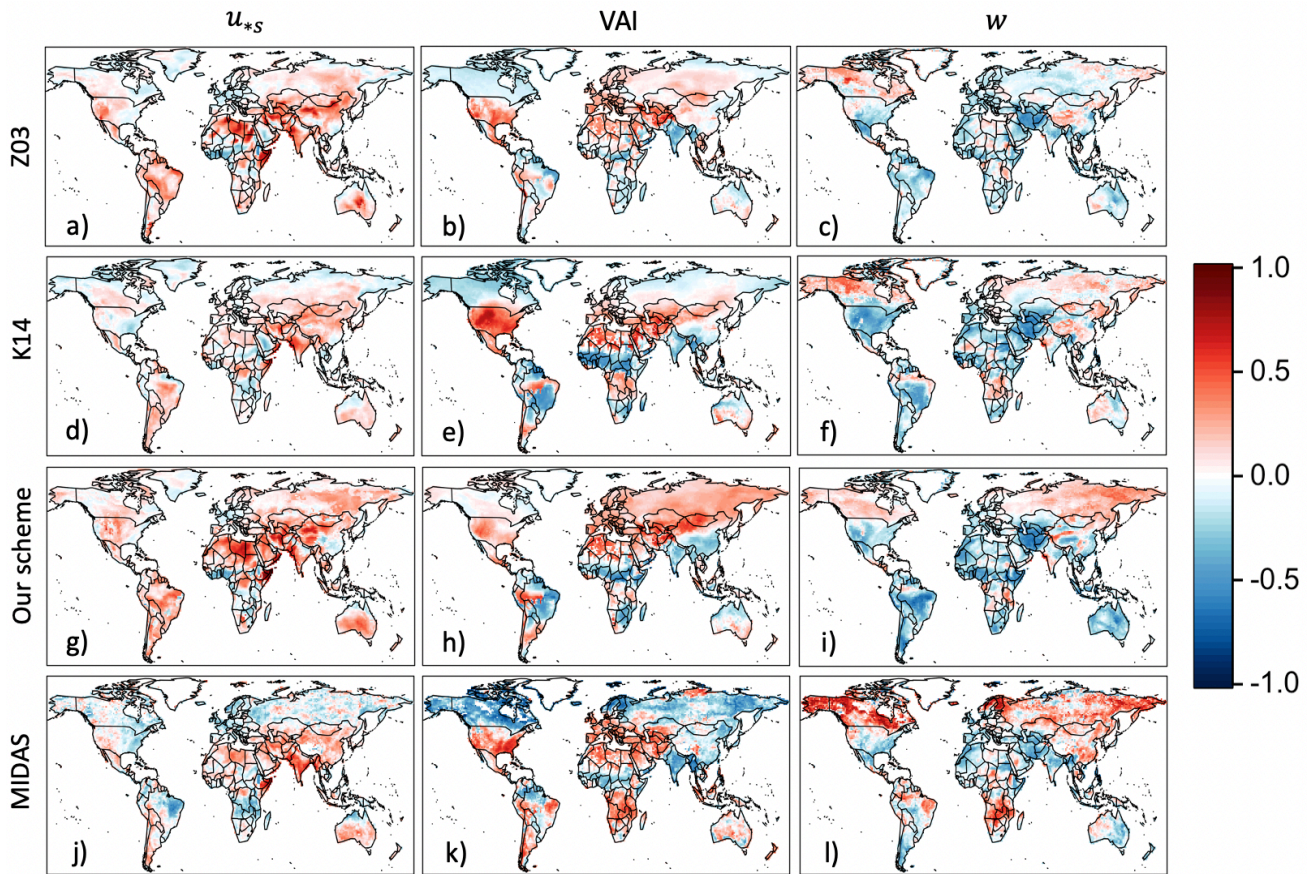

125 Figure S11. Grid-by-grid daily Pearson correlation maps between DAOD and the three fundamental  
 130 driving meteorological fields in CESM2 for 2004–2008. The first three rows use the DAOD simulated  
 using different emission schemes in CESM2, respectively (a-c) Z03, (d-f) K14, and (g-i) our scheme,  
 and the last row uses MIDAS DAOD. Each column represents a meteorological or land surface field  
 in CESM2 that fundamentally drives dust emission, including soil surface friction velocity  $u_{*s}$  ( $\text{m s}^{-1}$ )  
 as the left column (we use  $u_*$  for Z03 and K14, and MIDAS), vegetation area index (VAI;  $\text{m}^2$  plant /  
 $\text{m}^2$  land) as the middle column, and soil moisture  $w$  (kg water / kg soil) as the right column. Note that  
 the DAOD correlations do not cover the oceans because the meteorological and land surface fields  
 used here are only defined over the continents.

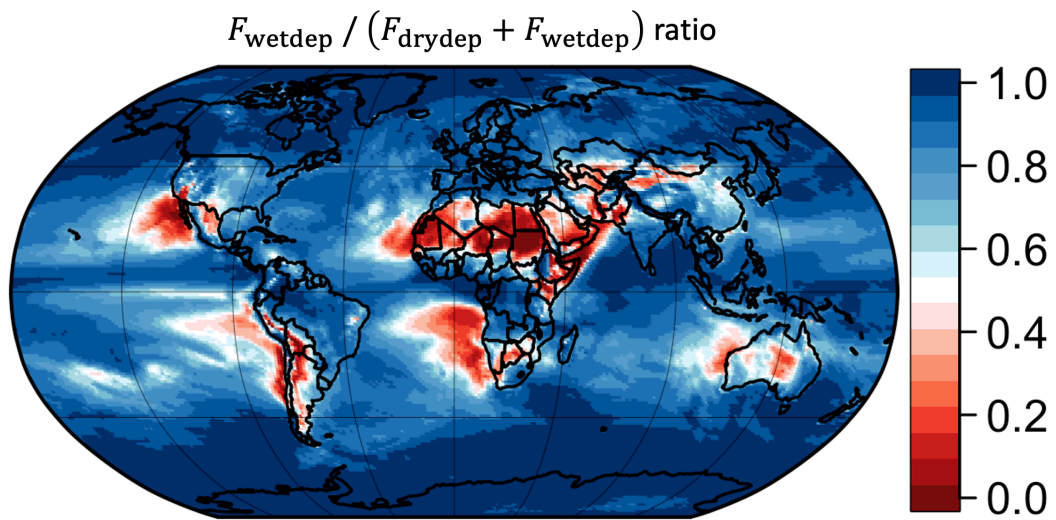

135 Figure S12. The fraction of wet dust deposition flux over the total (dry + wet) dust deposition flux, averaged across 2004–2008.

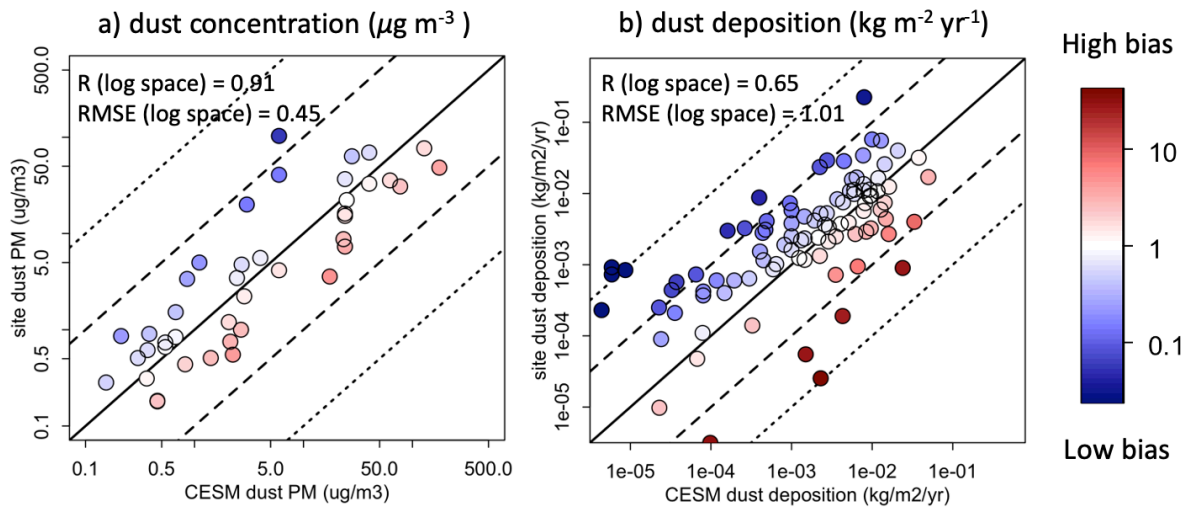

140 Figure S13. Our scheme's dust PM concentrations (in  $\mu\text{g m}^{-3}$ ) and depositions (in  $\text{kg m}^{-2} \text{yr}^{-1}$ ) after implementing the scaling map  $\tilde{K}_c$ , versus site dust PM concentrations and depositions.

Table S1. AERONET station location information for 39 selected dust-dominant AERONET stations following Kok et al. (2014b).

| Selected station name | Longitude  | Latitude  |
|-----------------------|------------|-----------|
| Agoufou               | -1.479117  | 15.34540  |
| Bahrain               | 50.609267  | 26.20805  |
| Banizoumbou           | 2.665190   | 13.54693  |
| Birdsville            | 139.345960 | -25.89893 |
| Blida                 | 2.880556   | 36.50833  |
| DMN Maine Soroa       | 12.023067  | 13.21672  |
| Dahkla                | -15.950000 | 23.71667  |
| Dakar                 | -16.958611 | 14.39417  |
| Dalanzadgad           | 104.419167 | 43.57722  |
| Dhabi                 | 54.382778  | 24.48056  |
| Dhadnah               | 56.324717  | 25.51282  |
| Djougou               | 1.599010   | 9.76007   |
| Eilat                 | 34.917500  | 29.50250  |
| Hamim                 | 54.300000  | 22.96667  |
| IASBS                 | 48.507111  | 36.70517  |
| IER Cinzana           | -5.933867  | 13.27843  |
| Ilorin                | 4.674500   | 8.48410   |
| Issyk-Kul             | 76.983056  | 42.62278  |
| Izana                 | -16.499060 | 28.30932  |
| Jaipur                | 75.806217  | 26.90582  |
| Kanpur                | 80.231639  | 26.51278  |
| Karachi               | 67.135940  | 24.94574  |
| La Laguna             | -16.321111 | 28.48194  |
| Lake Argyle           | 128.748500 | -16.10810 |
| Lampedusa             | 12.631667  | 35.51667  |
| Mezaira               | 53.754660  | 23.10452  |
| Mussafa               | 54.466667  | 24.37167  |
| Muztagh               | 75.038764  | 38.40822  |
| Nes Ziona             | 34.789167  | 31.92250  |
| Ouagadougou           | -1.487230  | 12.42413  |
| Ras El Ain            | -7.599444  | 31.67028  |
| SACOL                 | 104.137083 | 35.94600  |
| SEDE BOKER            | 34.782222  | 30.85500  |
| Saada                 | -8.155830  | 31.62583  |
| Santa Cruz Tenerife   | -16.247361 | 28.47253  |
| Solar Village         | 46.397286  | 24.90693  |
| Tamanrasset           | 5.530000   | 22.79000  |
| Tinga Tingana         | 139.990933 | -28.97583 |
| Zinder Airport        | 8.990233   | 13.77668  |
